# Supplementary material for: Processing Parameters and Ion Excipients Affect the Physicochemical Characteristics of the Stereocomplex-Formed Polylactide-b-Polyethylene Glycol Nanoparticles and Their Pharmacokinetics
Source: MDPI journal article supplement (doi:10.3390/pharmaceutics14030568), 2022-03-04
Supplement: s1 [file s1]

# Supplementary Materials: Processing Parameters and Ion Excipients Affect the Physicochemical Characteristics of the Stereocomplex-Formed Polylactide-*b*-Polyethylene Glycol Nanoparticles and Their Pharmacokinetics

Kohei Ogawa, Hidemasa Katsumi, Yasushi Moroto, Masaki Morishita and Akira Yamamoto

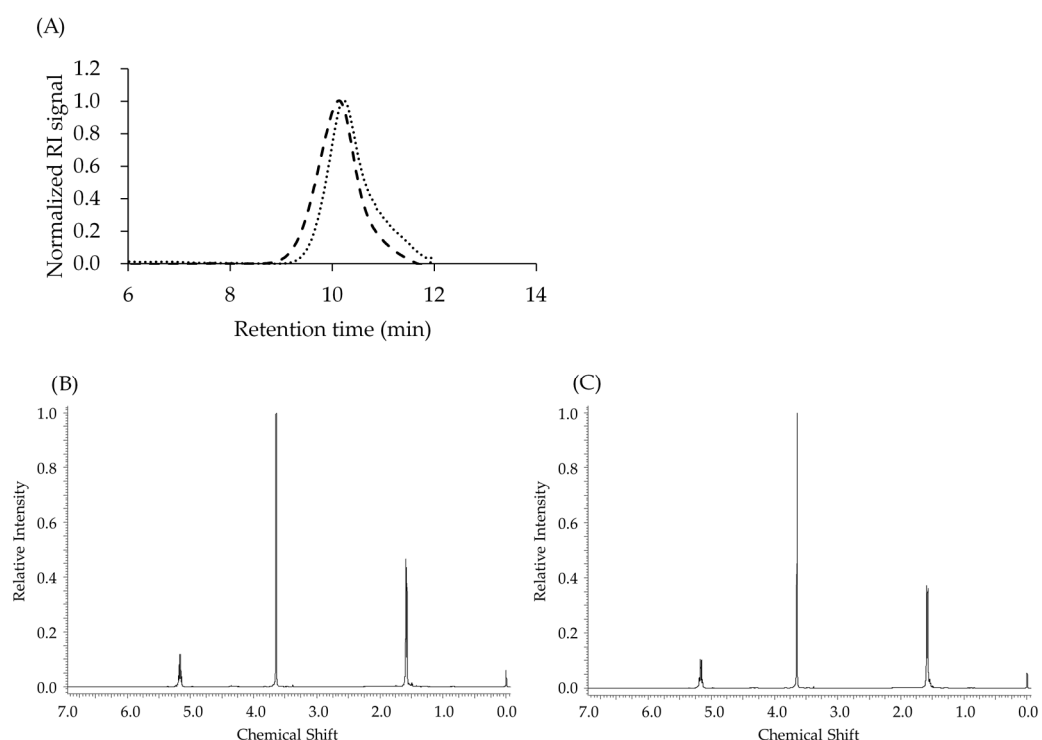

**Figure S1.** Size-exclusion chromatography–refractive index (SEC–RI) chromatogram and <sup>1</sup>H-NMR spectra of PLA-PEG unimers. Panel A indicates SEC–RI chromatograms. The dotted and dashed lines indicate L-lactide base PLA-PEG unimer and D-lactide-based PLA-PEG unimer, respectively. Panels B and C are <sup>1</sup>H-NMR plots of L-lactide base PLA-PEG unimer and D-lactide-based PLA-PEG unimer, respectively. The following chemical shifts were assigned: 3.31 ppm, CH<sub>3</sub>O of methoxy polyethylene glycol; 3.64 ppm, (CH<sub>2</sub>-CH<sub>2</sub>-O)<sub>n</sub> of methoxy-polyethylene glycol; 5.18 ppm, CH of polylactide; and 1.60 ppm, CH<sub>3</sub> of polylactide.

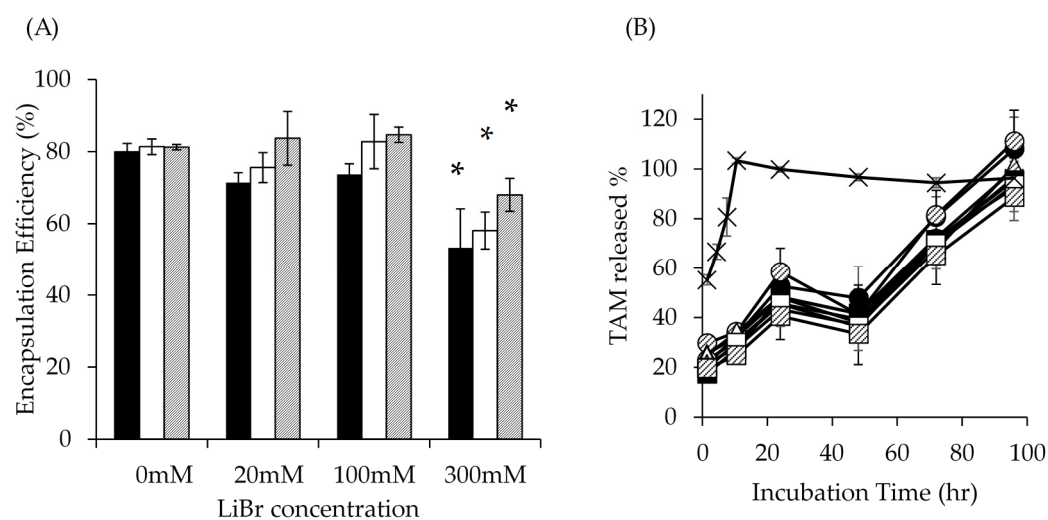

**Figure S2.** Encapsulation efficiency (EE) and release profile of tamoxifen (TAM) from SC-PEG nanoparticles (NPs). Panel A shows EE quantified by conventional method. Filled, open, and hatched bars indicate flow rates of 8 mL/min, 3 mL/min, and 1 mL/min, respectively. Results are expressed as the mean  $\pm$  standard deviation of three samples. The experiments were independently performed three times;  $*p < 0.05$ . Panel B shows release profile of TAM from NPs prepared by different process conditions. Closed, open, and hatched symbols indicate flow rates of 8 mL/min, 3 mL/min, and 1 mL/min, respectively. Circle, triangle, and square symbols indicate LiBr concentrations of 0 mM, 20 mM, and 100 mM, respectively. Results are expressed as the mean  $\pm$  standard deviation of three samples. The experiments were independently performed three times.

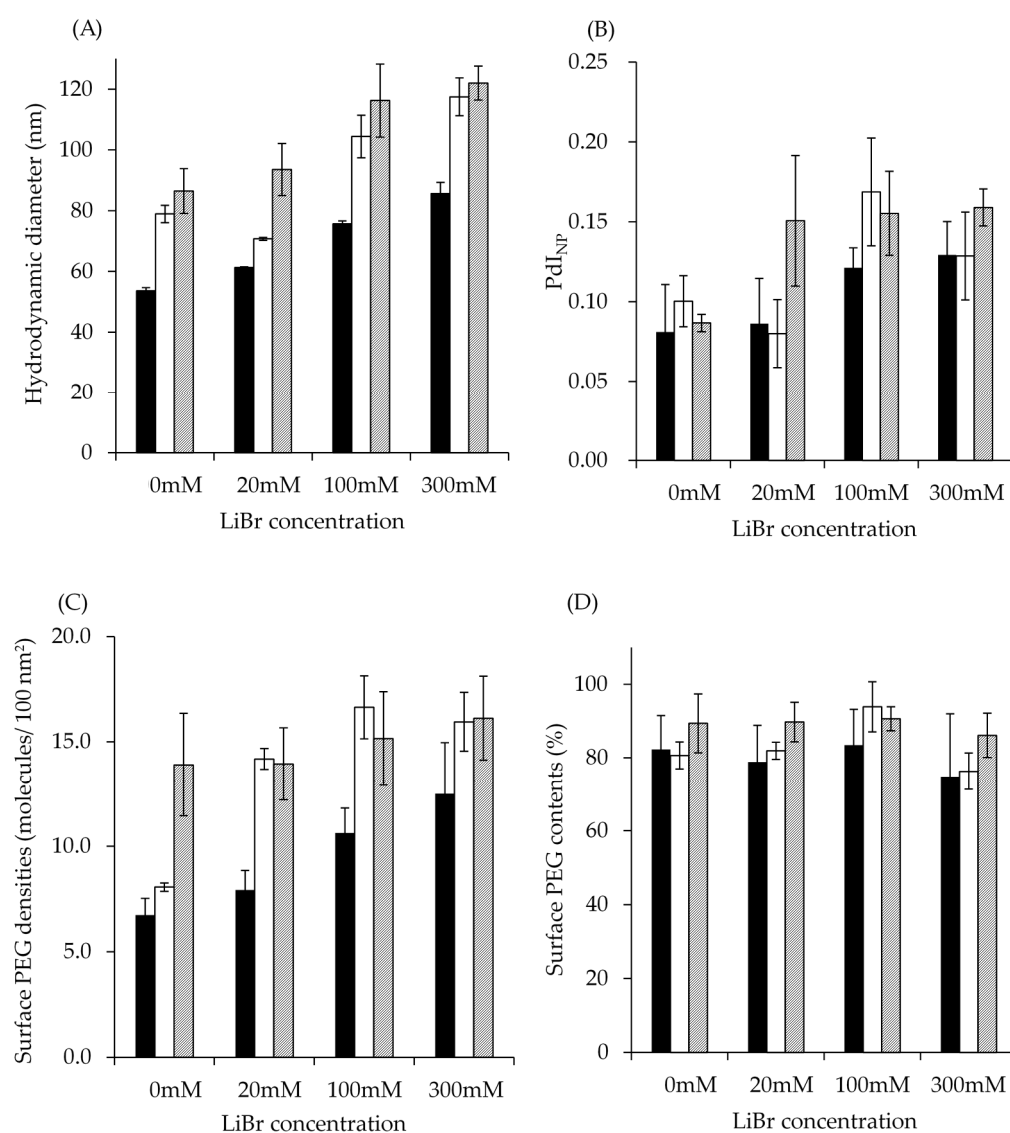

**Figure S3.** Hydrodynamic diameters (Dh), polydispersity index (PdINP), surface PEG densities, and surface PEG contents of SC-PEG nanoparticles (NPs) prepared by different process conditions. Panels (A), (B), (C), and (D) show Dh, PdINP, surface PEG densities, and surface PEG contents of SC-PEG NPs, respectively. Filled, open, and hatched bars indicate flow rates of 8 mL/min, 3 mL/min, and 1 mL/min, respectively. Results are expressed as the mean  $\pm$  standard deviation of three samples. The experiments were independently performed three times.

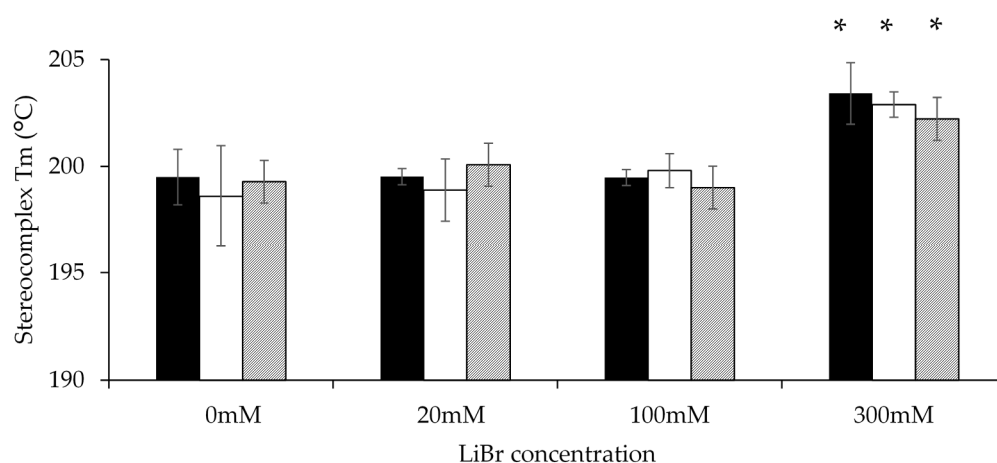

**Figure S4.** Melting temperature ( $T_m$ ) of PLA domain in lyophilized SC-PEG nanoparticles (NPs) prepared by different processing parameters. Melting temperature of PLA domain of lyophilized SC-PEG NPs is presented. Filled, open, and hatched bars indicate flow rates of 8 mL/min, 3 mL/min, and 1 mL/min, respectively. Results are expressed as the mean  $\pm$  standard deviation of three samples. The experiments were independently performed three times; \* $p < 0.05$ .

**Table S1.** Relative molecular weight and polydispersity of SC-PEG unimer in DMF containing LiBr.

| LiBr concentration   | 0 mM | 20 mM | 100 mM | 300 mM |
|----------------------|------|-------|--------|--------|
| Rel. $M_p$ (g/mole)* | 9636 | 8916  | 14189  | 22610  |
| $PdI_{uni}$          | **   | 1.86  | 1.11   | 3.52   |

\* Relative molecular weight of peak top. \*\*  $PdI_{uni}$  cannot be calculated.
